# Supplementary material for: A Citrulline‐Based Translational Population System Toxicology Model for Gastrointestinal‐Related Adverse Events Associated With Anticancer Treatments
Source: PubMed Central journal article supplement — CPT Pharmacometrics Syst Pharmacol. 2019 Nov 12;8(12):951–61. doi: 10.1002/psp4.12475 (PMC6930863; doi:10.1002/psp4.12475), 2019-11-12
Supplement: PSP4-8-951-s001.pdf [file PSP4-8-951-s001.pdf]

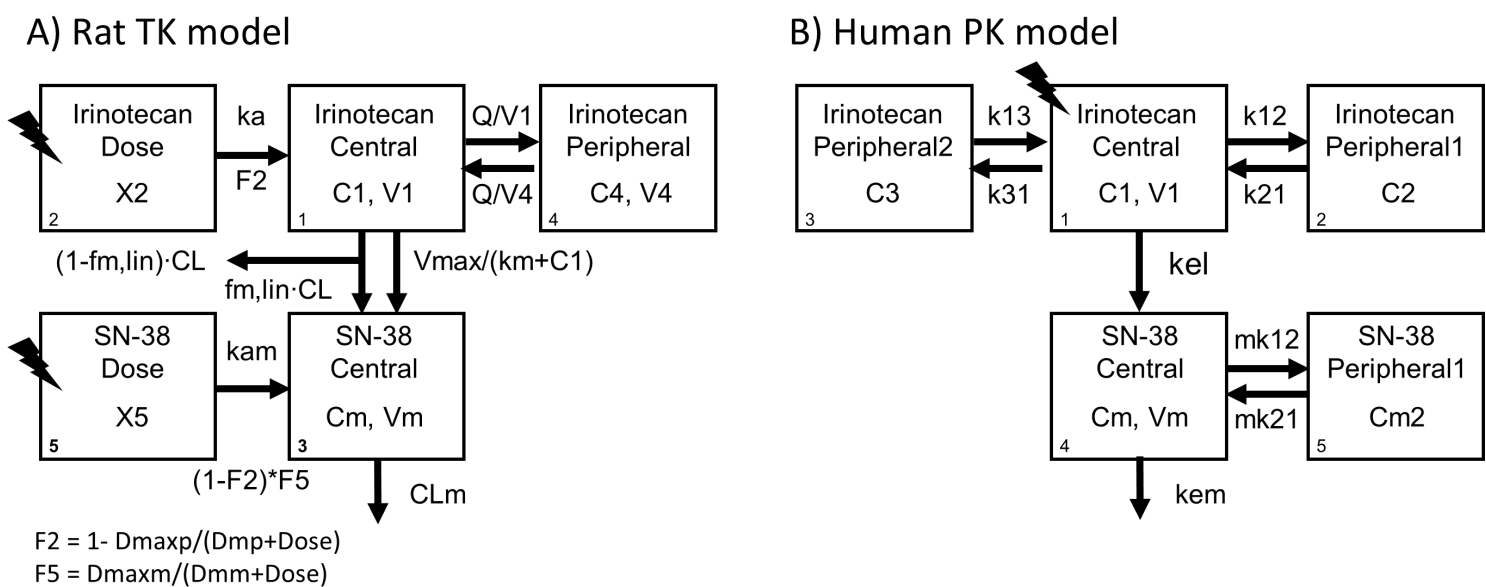

Figure S1  
 Schematic description of the pharmacokinetic (PK) models for irinotecan and SN-38. A) PK model for rats, B) PK model for human.<sup>1</sup>
