# Supplementary material for: A Citrulline‐Based Translational Population System Toxicology Model for Gastrointestinal‐Related Adverse Events Associated With Anticancer Treatments
Source: PubMed Central journal article supplement — CPT Pharmacometrics Syst Pharmacol. 2019 Nov 12;8(12):951–61. doi: 10.1002/psp4.12475 (PMC6930863; doi:10.1002/psp4.12475), 2019-11-12
Supplement: PSP4-8-951-s002.pdf [file PSP4-8-951-s002.pdf]

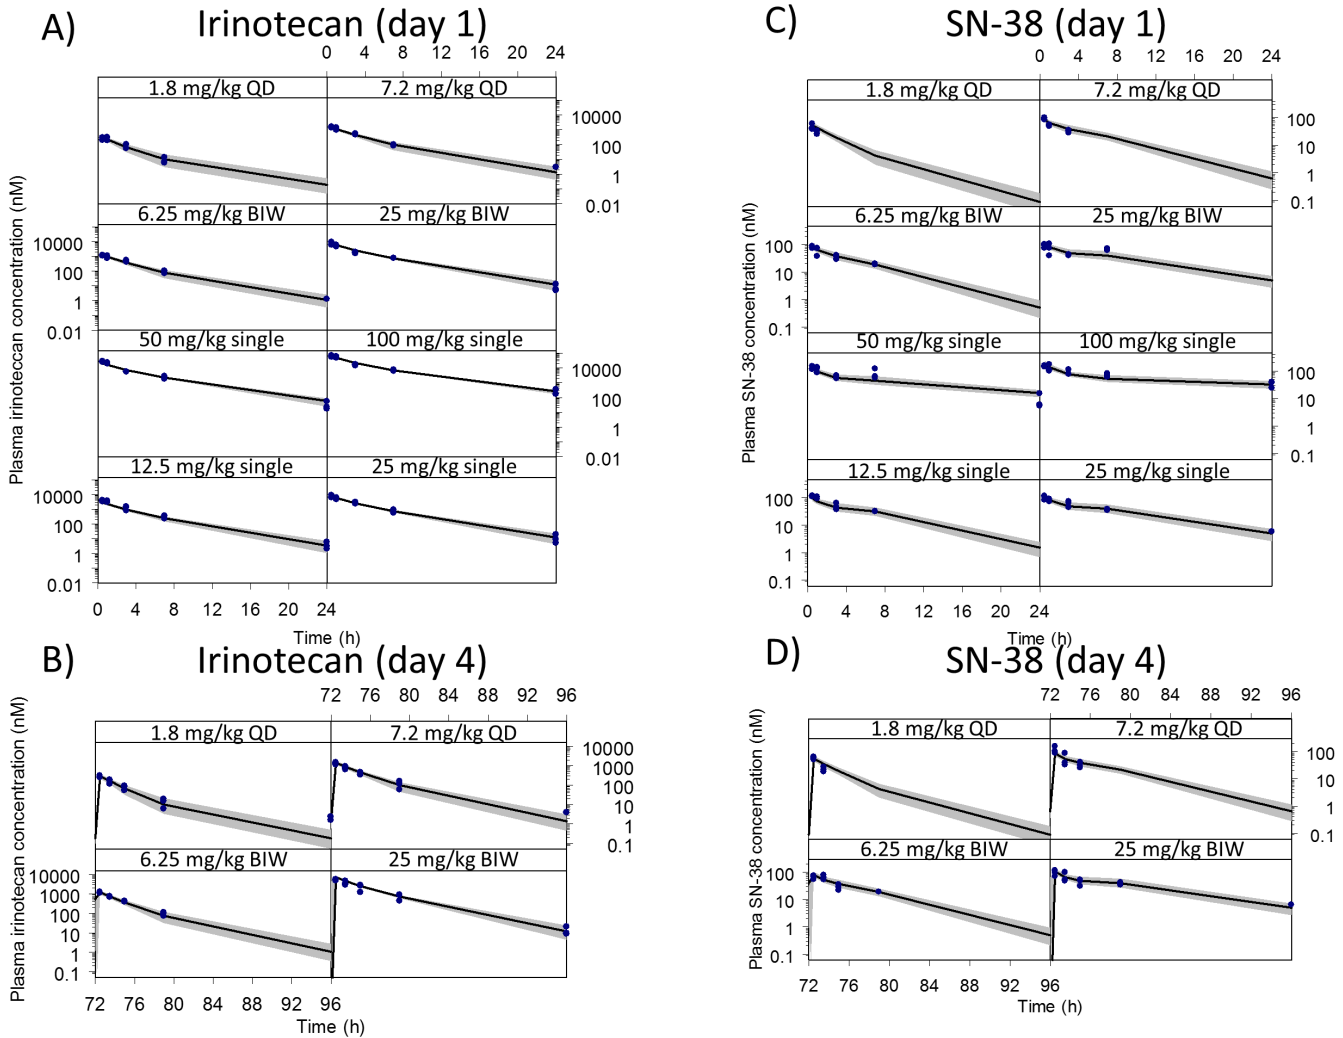

Figure S2

The visual predictive check analyses for population toxicokinetic model analysis of irinotecan and SN-38 after irinotecan treatment in rats. The observed and model simulated plasma concentration-time profiles was plotted for irinotecan and SN-38 after single (12.5, 25, 50 or 100 mg/kg) and multiple (6.25 or 25 mg/kg in twice a week (BIW) and 1.8 or 7.2 mg/kg in once daily (QD) dose schedules) administration of irinotecan in rats. A) and B) irinotecan on day 1 and day 4, C) and D) SN-38 on day 1 and day 4. In each panel, circles, a line and a shaded area represent the observed data (n=3), the model predicted population mean and the 90 percentiles of individual model predicts, respectively.
