# Supplementary material for: A Citrulline‐Based Translational Population System Toxicology Model for Gastrointestinal‐Related Adverse Events Associated With Anticancer Treatments
Source: PubMed Central journal article supplement — CPT Pharmacometrics Syst Pharmacol. 2019 Nov 12;8(12):951–61. doi: 10.1002/psp4.12475 (PMC6930863; doi:10.1002/psp4.12475), 2019-11-12
Supplement: PSP4-8-951-s003.pdf [file PSP4-8-951-s003.pdf]

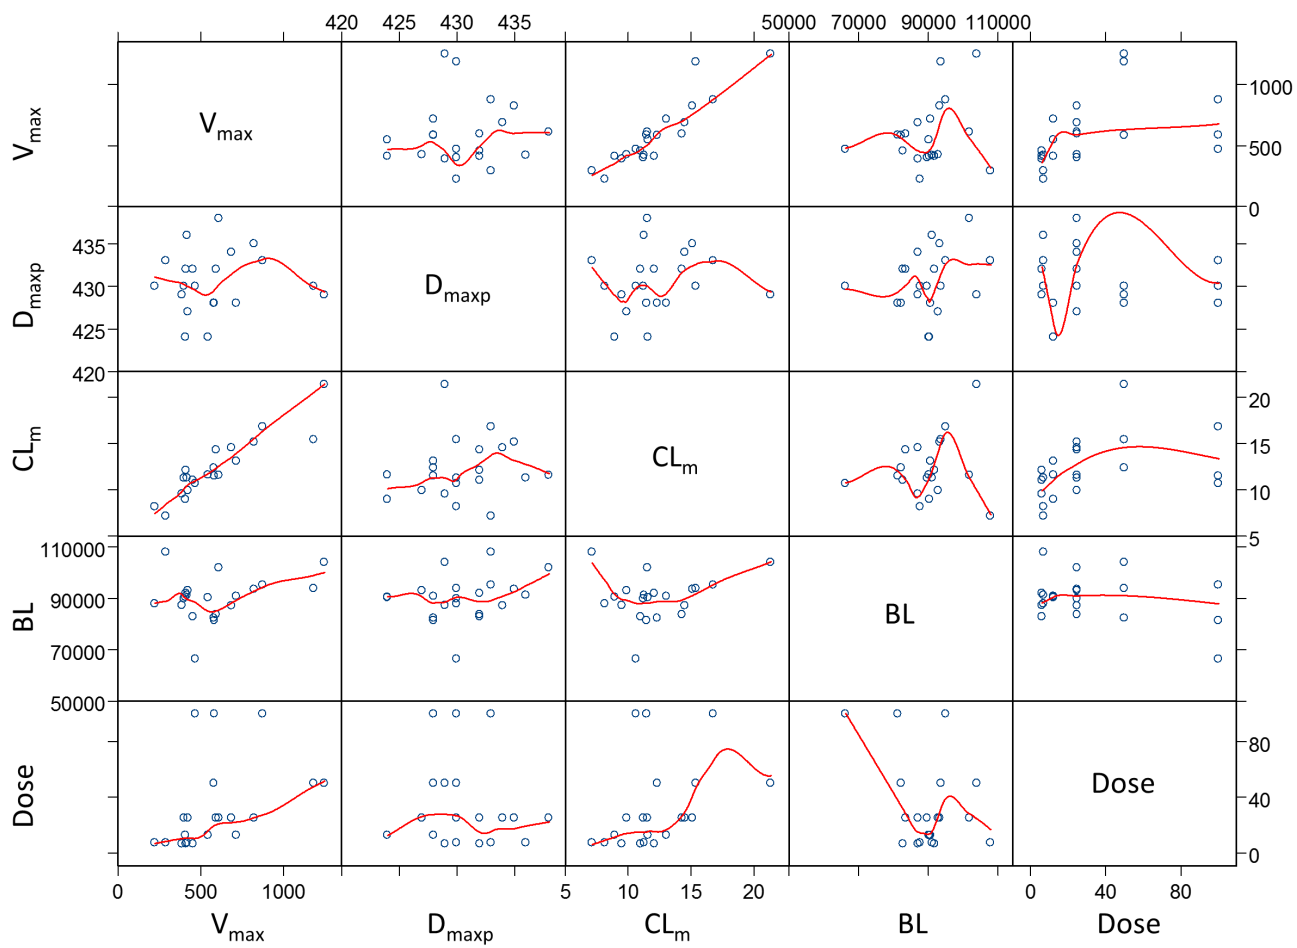

Figure S3 Scattered plots of individual system toxicology model parameters with random effect and dose. The correlation of individual parameters ( $V_{max}$ ,  $D_{maxp}$ ,  $CL_m$  and  $BL$ ) and their dose-dependency were plotted.
