# Supplementary material for: A Citrulline‐Based Translational Population System Toxicology Model for Gastrointestinal‐Related Adverse Events Associated With Anticancer Treatments
Source: PubMed Central journal article supplement — CPT Pharmacometrics Syst Pharmacol. 2019 Nov 12;8(12):951–61. doi: 10.1002/psp4.12475 (PMC6930863; doi:10.1002/psp4.12475), 2019-11-12
Supplement: PSP4-8-951-s005.pdf [file PSP4-8-951-s005.pdf]

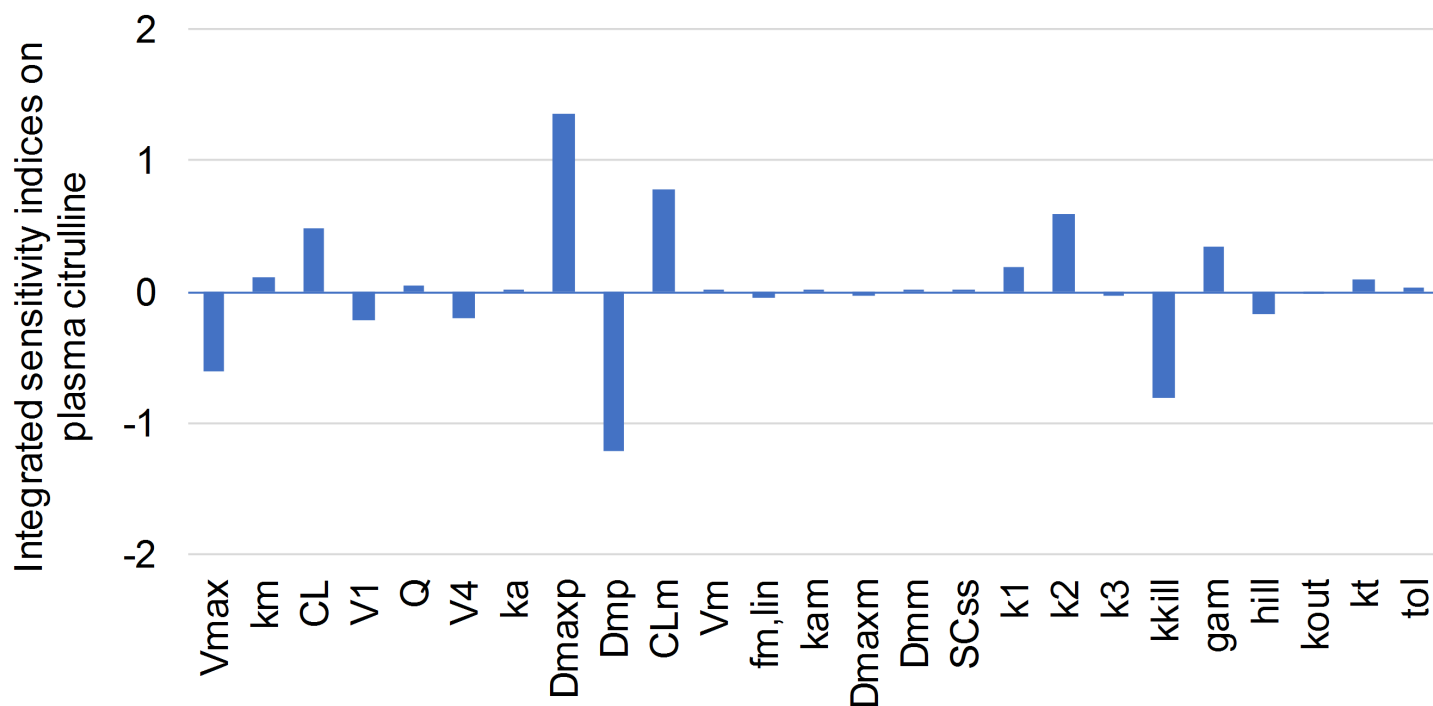

Figure S5

Sensitivity analysis for system toxicology model in rats. The integrated sensitivity indices represent the sensitiveness of plasma citrulline to the change of each parameter. The indices were calculated at a single dose of irinotecan at 25 mg/kg to rats by integrating the time-dependent sensitivity indices throughout the time course. The negative sensitivity indices indicated the parameter increase caused decreased plasma citrulline level.
