# Supplementary material for: A Citrulline‐Based Translational Population System Toxicology Model for Gastrointestinal‐Related Adverse Events Associated With Anticancer Treatments
Source: PubMed Central journal article supplement — CPT Pharmacometrics Syst Pharmacol. 2019 Nov 12;8(12):951–61. doi: 10.1002/psp4.12475 (PMC6930863; doi:10.1002/psp4.12475), 2019-11-12
Supplement: PSP4-8-951-s007.pdf [file PSP4-8-951-s007.pdf]

1 **Supplementary information**

2 **Mathematical description of quantitative system toxicology models**

3 The mathematical description of developed quantitative system toxicology models for irinotecan  
4 induced gastrointestinal (GI) adverse events (AEs) in rats was shown hereafter. The schematic  
5 description of quantitative system toxicology model and pharmacokinetic models in rats is found  
6 in Figure 1 and Supplemental figure 1(A), respectively. Parameter values were found in Table 1.

7

8 
$$dA1/dt=ka*D1-(Vmax/(km+A1/V1)+CL)*A1/V1-Q/V1*A1+Q/V4*A4 \quad (1)$$

9 
$$dA4/dt=Q/V1*A1-Q/V4*A4 \quad (2)$$

10 
$$dX2/dt=-ka*X2 \quad (3)$$

11 
$$dB3/dt=kam*X5+(Vmax/(km+A1/V1)+fm,lin*CL)*A1/V1-CLm/Vm*B3 \quad (4)$$

12 
$$dX5/dt=-kam*X5 \quad (5)$$

13 
$$F2=1-Dmaxp/(Dmp+Dose) \quad (6)$$

14 
$$F5=Dmaxm/(Dmm+Dose) \quad (7)$$

15

16 
$$dSC/dt=k1*SCss*fdbc-k1*SC-kill*SC*((SCss/SC)^{hill}) \quad (8)$$

17 
$$dPPC1/dt=k1*SC-k2*PPC1-kill*PPC1*((SCss*(k1/k2)/PPC1)^{hill}) \quad (9)$$

18 
$$dPPC2/dt=2*k2*PPC1-k2*PPC2-kill*PPC2*((2*SCss*(k1/k2)/PPC2)^{hill}) \quad (10)$$

19 
$$dPPC3/dt=2*k2*PPC2-k2*PPC3-kill*PPC3*((4*SCss*(k1/k2)/PPC3)^{hill}) \quad (11)$$

20 
$$dPPC4/dt=2*k2*PPC3-k2*PPC4-kill*PPC4*((8*SCss*(k1/k2)/PPC4)^{hill}) \quad (12)$$

21  $dENT1/dt=2*CV*k2*PPC4-k3*ENT1$  (13)

22  $dENT2/dt=k3*(ENT1-ENT2)$  (14)

23  $dENT3/dt=k3*(ENT2-ENT3)$  (15)

24  $dENT4/dt=k3*(ENT3-ENT4)$  (16)

25  $dENT5/dt=k3*(ENT4-ENT5)$  (17)

26

27  $killPPC=kkill*B3/Vm/1000/(1+Tol4/Vm*tol)$  (18)

28  $fdbc=(1/ENTresf)^{gam}$  (19)

29  $ENTresf=(ENT1+ENT2+ENT3+ENT4+ENT5)/(16*SCss*(k1/k3)*CV)/5$  (20)

30

31  $dCit/dt=ENTresf*kout*BL-kout*Cit$  (21)

32

33  $dTol1/dt=kt*(B3-Tol1)$  (22)

34  $dTol2/dt=kt*(Tol1-Tol2)$  (23)

35  $dTol3/dt=kt*(Tol2-Tol3)$  (24)

36  $dTol4/dt=kt*(Tol3-Tol4)$  (25)

37

38 Initial conditions

39  $A1=A2=B3=0, X2=F2*Dose, X5=(1-F2)*F5*Dose$

40  $SC = SC_{ss}$ ,  $PP1 = SC_{ss} \cdot (k1/k2)$ ,  $PP2 = 2 \cdot SC_{ss} \cdot (k1/k2)$ ,  $PP3 = 4 \cdot SC_{ss} \cdot (k1/k2)$ ,  $PP4 =$   
41  $8 \cdot SC_{ss} \cdot (k1/k2)$ ,  $ENT1=ENT2=ENT3=ENT4=ENT5=16 \cdot SC_{ss} \cdot (k1/k3) \cdot CV$   
42  $Cit = BL$ ,  $Tol1= Tol2= Tol3= Tol4=0$   
43  
44 A: irinotecan amount, B: SN-38 amount, X: dose amount, F: fraction available, SC: stem cell,  
45 PPC: proliferative progenitor cells, fdbc: feedback, ENT: enterocyte, ENTresf: residual fraction  
46 of enterocyte, Cit: citrulline, Tol: transit compartment for tolerance development.  
47 The quantitative system toxicology model for humans is the same as that for rats except for 1)  
48 the PK model for irinotecan and SN-38 was replaced with the published human PK model,<sup>1</sup> 2)  
49 number of transit compartments for proliferative progenitor cells are 5 and 3) tolerance was  
50 removed. The schematic description of pharmacokinetic models in humans is found in  
51 Supplemental figure 1(B). Parameter values were found in Table 2.  
52

53 References

- 54 1. Klein CE, *et al.* Population pharmacokinetic model for irinotecan and two of  
55 its metabolites, SN-38 and SN-38 glucuronide. *Clin Pharmacol Ther* 72 638-647.  
56 (2002)

57

58 Supplemental figure legends

59 Figure S1 Schematic description of the pharmacokinetic (PK) models for irinotecan  
60 and SN-38. A) PK model for rats, B) PK model for human.<sup>1</sup>

61  
62 Figure S2 The visual predictive check analyses for population toxicokinetic model  
63 analysis of irinotecan and SN-38 after irinotecan treatment in rats. The observed and model  
64 simulated plasma concentration-time profiles was plotted for irinotecan and SN-38 after single  
65 (12.5, 25, 50 or 100 mg/kg) and multiple (6.25 or 25 mg/kg in twice a week (BIW) and 1.8 or 7.2  
66 mg/kg in once daily (QD) dose schedules) administration of irinotecan in rats. A) and B)  
67 irinotecan on day 1 and day 4, C) and D) SN-38 on day 1 and day 4. In each panel, circles, a line  
68 and a shaded area represent the observed data (n=3), the model predicted population mean and  
69 the 90 percentiles of individual model predicts, respectively.

70  
71 Figure S3 Scattered plots of individual system toxicology model parameters with  
72 random effect and dose. The correlation of individual parameters ( $V_{max}$ ,  $D_{maxp}$ ,  $CL_m$  and  $BL$ )  
73 and their dose-dependency were plotted.

74  
75 Figure S4 The incorporation of tolerance development improved the goodness of fit  
76 to the observed plasma citrulline profiles after multiple doses of irinotecan to rats. The observed  
77 and model simulated plasma citrulline concentration-time profiles were plotted after multiple  
78 administrations of irinotecan (25 mg/kg in BIW and 7.2 mg/kg in QD) in rats by the system  
79 toxicology model A) with tolerance development or B) without it. In each panel, symbols, error

80 bars and lines represent the mean observed data (n=3), standard deviation and the model  
81 predicted population mean, respectively. The purple and orange arrows on the x-axis represent  
82 dose timing.

83

84 Figure S5 Local sensitivity analysis for the system toxicology model in rats. The  
85 integrated sensitivity indices represent the sensitiveness of plasma citrulline to the change of  
86 each parameter. The indices were calculated at a single dose of irinotecan at 25 mg/kg to rats by  
87 integrating the time-dependent sensitivity indices throughout the time course. The negative  
88 sensitivity indices indicated the parameter increase led decreased plasma citrulline level.

89

90
